# 1 **Intraspecies genomic divergence of coral algal symbionts shaped** 2 **by gene duplication**

3 Sarah Shah<sup>1</sup>, Katherine E. Dougan<sup>1</sup>, Yibi Chen<sup>1</sup>, Debashish Bhattacharya<sup>2</sup>, Cheong Xin  
4 Chan<sup>1</sup>

5 <sup>1</sup>The University of Queensland, School of Chemistry and Molecular Biosciences, Australian  
6 Centre for Ecogenomics, Brisbane, 4072 QLD, Australia.

7 <sup>2</sup>Rutgers University, Department of Biochemistry and Microbiology, New Brunswick, NJ,  
8 08901, USA

## 9 **Abstract**

10 Dinoflagellates of Order Suessiales include the diverse Family Symbiodiniaceae known for  
11 their role as essential coral reef symbionts, and the cold-adapted *Polarella glacialis*. These  
12 taxa inhabit a broad range of ecological niches and exhibit extensive genomic divergence,  
13 although their genomes are in the smaller size ranges (haploid size < 3 Gbp) compared to  
14 most other dinoflagellates. Different isolates of a species are known to form symbiosis with  
15 distinct hosts and exhibit different regimes of gene expression, but intraspecies whole-  
16 genome divergence remains little known. Focusing on three Symbiodiniaceae species (the  
17 free-living *Effrenium voratum*, and the symbiotic *Symbiodinium microadriaticum* and  
18 *Durusdinium trenchii*) and the free-living outgroup *P. glacialis*, all for which whole-genome  
19 data from multiple isolates are available, we assessed intraspecies genomic divergence at  
20 sequence and structural levels. Our analysis based on alignment and alignment-free methods  
21 revealed greater extent of intraspecies sequence divergence in symbiodiniacean species than  
22 in *P. glacialis*. Our results also reveal the implications of gene duplication in generating  
23 functional innovation and diversification of Symbiodiniaceae, particularly in *D. trenchii* for  
24 which whole-genome duplication was involved. Interestingly, tandem duplication of single-  
25 exon genes was found to be more prevalent in genomes of free-living species than in those of  
26 symbiotic species. These results in combination demonstrate the remarkable intraspecies  
27 genomic divergence in dinoflagellates under the constraint of reduced genome sizes, shaped  
28 by genetic duplications and symbiogenesis events during diversification of Symbiodiniaceae.

## 29 Introduction

30 Dinoflagellates of the Order Suessiales include the Family Symbiodiniaceae, which  
31 predominantly consists of symbiotic lineages essential to coral reef organisms.  
32 Symbiodiniaceae taxa collectively exhibit a broad spectrum of symbiotic associations (i.e.,  
33 facultativeness) and variable degrees of host specificity (i.e., host-specialist vs host-  
34 generalist), although some are described as solely free-living (Thornhill et al. 2014;  
35 LaJeunesse et al. 2018). A comparative analysis of whole-genome sequences from 15 taxa  
36 revealed extensive sequence and structural divergence among Symbiodiniaceae taxa, which  
37 was more prevalent in isolates of the symbiotic species, *Symbiodinium microadriaticum*  
38 (González-Pech et al. 2021). This was supported by a metagenomics survey of single-  
39 nucleotide polymorphisms in the genomes of symbiotic *Symbiodinium fitti* from different  
40 coral taxa and biogeographical origins, revealing intraspecies sequence divergence correlated  
41 to coral host taxa (Reich et al. 2021).

42 A recent comparative genomic analysis incorporating genomes from three isolates of  
43 the free-living species *E. voratum* revealed genome features representative of the  
44 Symbiodiniaceae progenitor, due to the absence of symbiogenesis in the *Effrenium* lineage  
45 (Shah et al. 2023). These features include longer introns, more extensive RNA editing, less  
46 pseudogenisation, and, perhaps most surprisingly, similar genome sizes when compared to  
47 symbiotic counterparts. The genome size of *E. voratum* suggests that genome reduction (to  
48 haploid genome size < 3Gbp) occurred in symbiodiniacean dinoflagellates before  
49 diversification of Order Suessiales (Shah et al. 2023). These results further hint at a role of  
50 symbiotic lifestyle in shaping intraspecies genomic divergence and the evolution of these  
51 taxa. Intragenomic variation of the ITS2 phylogenetic marker sequences is known among  
52 Symbiodiniaceae taxa (Wilkinson et al. 2015; Hume et al. 2019). However, intraspecies  
53 whole-genome divergence in these taxa relative to symbiotic versus free-living lifestyle  
54 remains little known. Whole-genome data from multiple isolates of a species provide an  
55 excellent analysis platform to address this knowledge gap.

56 Here, we investigate intraspecies genomic divergence in four Suessiales species (of  
57 which three are Symbiodiniaceae); these taxa represent two free-living species and two  
58 symbiotic species, for which whole-genome data from multiple isolates are available. We  
59 focus specifically on sequence and structural conservation, gene family dynamics, and gene  
60 duplication, and how these features may reflect adaptation to the distinct lifestyles.

## 61 **Results and Discussion**

62 We used four Suessiales species for which multi-isolate genome data are publicly available,  
63 to investigate patterns of intraspecies genomic divergence related to facultative lifestyle. The  
64 two symbiotic symbiodiniacean species, *S. microadriaticum* (González-Pech et al. 2021;  
65 Nand et al. 2021) and *Durusdinium trenchii* (Dougan et al. 2022a), represent taxa that arose  
66 from independent origins of symbiogenesis (Figure 1 and Supplementary Table S1). The  
67 remaining two are free-living species, the symbiodiniacean *E. voratum* (Shah et al. 2023) and  
68 *Polarella glacialis* that is sister to the Symbiodiniaceae in the Order Suessiales (Stephens et  
69 al. 2020). The available genome data were generated from isolates collected over vast  
70 geographic areas: the thermotolerant symbiont *D. trenchii* from the Caribbean Sea and  
71 Pacific Ocean, the free-living *E. voratum* from the Mediterranean Sea and both sides of the  
72 Pacific Ocean, the symbiotic *S. microadriaticum* from the Red Sea, Pacific Ocean, and the  
73 Caribbean Sea, and the psychrophilic *P. glacialis* from the Antarctic and Arctic oceans  
74 (Figure 1). Collectively, these data provide a robust analytic framework for interrogating  
75 intraspecies genomic divergence.

### 77 **Genomes of facultative symbionts exhibit higher sequence divergence**

78 We investigated divergence of genome sequence following the approach of González-Pech et  
79 al. (2021). For each pairwise comparison of genome sequences, we calculated the percentage  
80 of aligned bases,  $Q$ , and overall sequence identity of aligned regions,  $ID$ . Genome sequences  
81 from isolates of the same species are highly similar ( $Q > 70.2\%$ ,  $ID > 98.6\%$  with minimum  
82 alignment length 100 bp; Figure 2A, see Supplementary Figure S1 for detail), compared to  
83 those between species ( $Q < 10.0\%$ ,  $ID < 98.6\%$ ). High intraspecies sequence similarity was  
84 observed despite the diverse geographic origins for isolates from each species (Figure 1).  
85 Genome sequences of the free-living *P. glacialis* were the most similar ( $Q = 95.5\%$ ,  $ID =$   
86  $98.7\%$ ; CCMP1383 against CCMP2088), followed by the symbiotic *D. trenchii* ( $Q = 93.3\%$ ,  
87  $ID = 99.8\%$ ; CCMP2556 against SCF082), the free-living *E. voratum* ( $Q = 92.0\%$ ,  $ID = 99.4\%$ ;  
88 RCC1521 against rt-383), and the symbiotic *S. microadriaticum* ( $Q = 78.5\%$ ,  $ID = 99.7\%$ ;  
89 CCMP2467 against CassKB8). Among the three *E. voratum* isolates, CCMP421 showed  
90 smaller percentage of aligned genome bases against rt-383 ( $Q = 70.2\%$ ) and against  
91 RCC1521 ( $Q = 79.2\%$ ), compared to  $Q = 92.0\%$  observed between RCC1521 and rt383; this  
92 is likely due to the more-fragmented CCMP421 genome assembly, also reflected in the low

93 percentage of mapped sequence reads (Supplementary Table S2). Between the two symbiotic  
94 species, the greater divergence observed in *S. microadriaticum* might represent its much  
95 earlier emergence and diversification (LaJeunesse et al. 2018). Alternatively, the lower  
96 divergence in *D. trenchii* may be due to the recent whole-genome duplication (WGD) in this  
97 lineage (Dougan et al. 2022a). Genome data of multiple isolates from a broader taxon  
98 representation of Symbiodiniaceae lineages will help clarify the possible link between  
99 intraspecies divergence and facultative lifestyle of these symbionts.

100 To extend genome comparisons beyond alignable sequence regions, we further  
101 assessed sequence divergence using an alignment-free  $k$ -mer-based approach. This approach  
102 was found to be robust against the contiguity of genome assemblies (Dougan et al. 2022c),  
103 and has been applied successfully to discover distinct phylogenetic signals in different  
104 genomic regions of Symbiodiniaceae (Lo et al. 2022; Shah et al. 2023). We followed Lo et al.  
105 (2022) to derive pairwise  $D_2^S$  distances,  $d$ , based on shared  $k$ -mer profiles at  $k = 23$  observed  
106 in whole-genome sequences (see Methods). As shown in Figure 2B, the lowest sequence  
107 divergence was seen in *P. glacialis* ( $d = 0.30$ ), followed by *E. voratum* ( $d = 0.53$  between  
108 RCC1521 and rt-383;  $d = 0.9$  when implicating the more-fragmented CCMP421 assembly),  
109 *D. trenchii* (0.54), and the three *S. microadriaticum* isolates (0.72-0.76). This pattern of  
110 divergence is consistent with our observations based on  $Q$  and  $ID$  in Figure 2A.

111 We further assessed the conserved core 23-mers in each species (i.e.,  $k$ -mers common  
112 in genomes of all isolates within a species). For each species, we assessed the extent of  
113 genome content shared among the isolates based on  $x$ , the percentage of core 23-mers relative  
114 to all distinct 23-mers; in the perfect scenario where genomes of all isolates are identical,  $x =$   
115 100%. Using this approach, *E. voratum* and *S. microadriaticum* show similar extent of shared  
116 genome content among their corresponding isolates ( $x$  ranges between 19.5% and 25.2%;  
117 Supplementary Table S3). Approximately two-fold greater  $x$  was observed for *P. glacialis*  
118 (52.3-54.9%) and *D. trenchii* (55.6-55.7%); this observation likely reflects the impact of a  
119 diploid genome assembly in the former (Stephens et al. 2020) and WGD in the latter (Dougan  
120 et al. 2022a). Duplicated genomic regions arising from WGD are resolved over long  
121 evolutionary time scales of hundreds of millions of years (Carretero-Paulet and Van de Peer  
122 2020). Given the recent ( $\sim 1$  MYA) WGD in *D. trenchii*, this species likely has not had  
123 sufficient time to resolve genetic redundancy. Regardless, our results here lend support to the  
124 general utility of  $k$ -mer-derived distances in clarifying genome-sequence divergence beyond  
125 gene boundaries, which may serve as evidence to guide or complement taxonomic

126 classification of Symbiodiniaceae, and potentially of other dinoflagellates (Dougan et al.  
127 2022c).

128

### 129 **Intraspecies structural divergence in the genomes of Symbiodiniaceae**

130 To assess intraspecies structural genomic divergence, we identified collinear gene blocks in  
131 all possible pairwise genome comparisons for each species (see Methods); the greater  
132 recovery of these blocks and their implicated genes indicates a greater conserved synteny  
133 among the isolates in a species. As expected, due to recent WGD, the two symbiotic *D.*  
134 *trenchii* isolates CCMP2556 and SCF082 displayed the greatest conserved synteny (1,613  
135 blocks implicating ~22% of total genes spanning 181-199 Mbp; Supplementary Table S4).  
136 On the other hand, genomes of the symbiotic *S. microadriaticum* (100-196 blocks, 2.7-3.6%  
137 of genes, 8.1-16 Mbp) showed less conserved synteny than the free-living *E. voratum*  
138 RCC1521 and rt383 (344 blocks, 6.6-8.1% of genes, 51-60 Mbp; Supplementary Table S4);  
139 at first glance this result appears to support observations in an earlier study (González-Pech et  
140 al. 2021) that the extent of structural rearrangements is greater in genomes of facultative  
141 symbionts than those of free-living taxa. However, the greater contiguity of the *E. voratum*  
142 assemblies (scaffold N50 length = 720 Kbp for RCC1521, 252 Kbp for rt-383) than that of *S.*  
143 *microadriaticum* assemblies (e.g., scaffold N50 length = 43 Kbp for CassKB8 and 50 Kbp for  
144 04-503SCI.03) represents a systematic bias that would affect recovery of collinear gene  
145 blocks. *S. microadriaticum* CCMP2467 (N50 length 9.96 Mbp) (Supplementary Table S1),  
146 the sole representation of a chromosome-level assembly, lacks comparative power in this  
147 instance. As a case in point, the inclusion of the fragmented assembly of *E. voratum*  
148 CCMP421 (N50 length 304 Kbp; 38,022 scaffolds) lowers the extent of conserved synteny  
149 identified in *E. voratum* (195-331 blocks, 4.4-7.9% of genes, 30-65 Mbp; Supplementary  
150 Table S4), and we identified no collinear gene blocks between the outgroup *P. glacialis*  
151 isolates due in part to sparsity of genes on the assembled genome scaffolds (Stephens et al.  
152 2020). These results in combination suggest that while structural rearrangements contribute to  
153 structural divergence of Symbiodiniaceae genomes as postulated in those of facultative  
154 symbionts (González-Pech et al. 2019) even at intraspecies level, such an analysis based on  
155 collinear gene blocks is sensitive to contiguity of assembled genome sequences. An in-depth  
156 assessment of structural divergence would require genome assemblies of comparably high  
157 quality.

158

## 159 **Genetic duplication enables functional innovation**

160 We assessed the evolution of protein families for evidence of functional innovation and  
161 divergence within species, and its relation to lifestyle. For each species, we inferred  
162 homologous protein sets with OrthoFinder using sequences predicted from all corresponding  
163 isolates (see Methods); the homologous sets that are specific to an isolate may reflect  
164 instances of contrasting divergence in and/or specialisation of protein functions (e.g., putative  
165 remote homologs), occurring at distinct evolutionary rates. First, we assessed number of  
166 isolate-specific sets for each species based on OrthoFinder results ran at default parameters  
167 (i.e., inflation parameter  $I = 1.5$ ). The highest percentage of isolate-specific sets was observed  
168 in *D. trenchii* (17.2% of total sets), followed by *P. glacialis* (16.0%); these numbers are  
169 nearly four-fold greater than that observed in *S. microadriaticum* (4.0%) and *E. voratum*  
170 (4.1%; Figure 3). To investigate the robustness of this result, we increased the inflation  
171 parameter ( $I$ ) for clustering within OrthoFinder that controls the granularity (i.e., higher  
172 inflation parameter produces smaller clusters). As expected in all cases, the increase of  $I$   
173 resulted in an increase of isolate-specific protein sets; at  $I = 10$ , the percentage of these sets is  
174 37.8% (*D. trenchii*), 32.4% (*P. glacialis*), 15.6% (*S. microadriaticum*), and 10.8% (*E.*  
175 *voratum*). Despite the high synteny and sequence conservation in *D. trenchii*, the substantial  
176 number of protein families retained in duplicate after WGD show evidence of isolate-specific  
177 divergence and/or specialization in *D. trenchii* where facultative lifestyle has been  
178 hypothesized to be the main driver of post-WGD adaptation (Dogan et al. 2022a). On the  
179 other hand, the comparable extent of isolate-specific protein sets in *P. glacialis* may represent  
180 heterozygosity inherent to a diploid representation of the genome assembly (Stephens et al.  
181 2020), distinct from the haploid genome assemblies among the Symbiodiniaceae taxa. None  
182 of the *E. voratum* and *S. microadriaticum* isolates showed evidence of WGD (Supplementary  
183 Table S5), and thus the similar level of isolate-specific divergence in these species supports  
184 the notion of massive genome reduction in the Suessiales ancestor, with WGD a mechanism  
185 for escaping this process to generate functional innovation, as observed in *D. trenchii*  
186 (Dogan et al. 2022a).

187

## 188 **Genomes of free-living species exhibit greater extent of tandemly duplicated single-exon** 189 **genes**

190 Tandemly duplicated (TD) genes, i.e., duplicated genes found next to each other on the  
191 genome, are part of unidirectional gene clusters commonly found in dinoflagellates, thought

192 to facilitate their expression (Nand et al. 2021; Chen et al. 2022). In an earlier study  
193 (Stephens et al. 2020), ~40% of the gene repertoire in *P. glacialis* genomes were located in  
194 unidirectional gene clusters, many of which encoded functions associated with cold and low-  
195 light adaptation. Here we defined a TD block as a block comprising two or more consecutive  
196 genes with high sequence identity on a genome scaffold (see Methods). In our independent  
197 survey of TD genes in all 19 available Suessiales genomes, we found the largest number and  
198 proportion of TD genes in the free-living lineages of *P. glacialis* (7.8% in CCMP1383, 9.2%  
199 in CCMP2088) and *S. natans* (7.1%), followed by the symbiotic *S. tridacnidorum*  
200 CCMP2592 (6.5%) and *C. goreau* SCF055 (6.0%), with smaller proportions observed in the  
201 free-living *E. voratum* (3.9% in rt-383, 4.4% in RCC1521), and the smallest in *S.*  
202 *microadriaticum* (1.0-2.2%) (Table 1). Some of the largest TD blocks consisted of 13-16  
203 genes, found in genomes of free-living lineages (*S. natans*, and the *P. glacialis* CCMP1383  
204 and CCMP2088). Among the free-living *E. voratum* isolates, the TD block sizes were slightly  
205 smaller, implicating genes encoding ribulose biphosphate carboxylase (the largest block of 9  
206 genes in RCC1521), HECT and RLD domain-containing E3 ubiquitin protein ligase 4 (rt-  
207 383, 7 genes), calmodulin (rt-383, 7 genes), and solute carrier family 4 (rt-383, 7 genes)  
208 (Supplementary Table S6); these implicated functions are essential for photosynthesis, ion  
209 binding, and transmembrane transport. However, we cannot dismiss the possibility of  
210 genome-assembly contiguity in affecting recovery of TD blocks. For instance, the recovery of  
211 TD genes in the chromosome-level assembly of *S. microadriaticum* CCMP2467 is 2.2%  
212 versus ~1.0% in the other two assemblies, and the recovery of 1.5% in *E. voratum* CCMP421  
213 contrasts to 3.9-4.4% in the other two *E. voratum* genomes. Despite this, a greater extent of  
214 TD genes in free-living lineages (*P. glacialis*: 55.2-59.4%; *E. voratum* RCC1521: 23.1% and  
215 rt-383: 22.5%; *S. natans*: 21.8%) were single-exon genes, in contrast to the symbiotic *D.*  
216 *trenchii* and *S. microadriaticum* (4.2-9.2%) (Table 1). Our results lend support to the notion  
217 that tandem duplication may facilitate transcription of genes encoding essential functions  
218 implicating single-exon genes, and is potentially more prominent in genomes of free-living  
219 taxa than those of symbiotic lineages (Stephens et al. 2020).

220 Introner elements (IE) are non-autonomous mobile elements characterised by inverted  
221 repeat motifs within introns that are hypothesised to propagate introns into genes (Worden et  
222 al. 2009; van der Burg et al. 2012; Huff et al. 2016), which have been found to be more  
223 prevalent in genomes of free-living dinoflagellate species (Farhat et al. 2021; Dougan et al.  
224 2022b; Shah et al. 2023). We examined the presence of these elements in the assembled  
225 genomes and TD genes for the multi-isolate Suessiales species (Supplementary Table 1). We

226 found the proportion of IE-containing genes overall to be less in Symbiodiniaceae (3.2-6.3%)  
227 than *P. glacialis* (10.7-11.5%), a trend also observed in the genome of bloom-forming  
228 dinoflagellate species, *Prorocentrum cordatum* (10.4%) (Dougan et al. 2022b). Nonetheless,  
229 IEs were only found in a small proportion of TD genes (2.5-5.7%) per Suessiales isolate,  
230 suggesting they are neither connected to lifestyle nor play a major role in propagating TD  
231 genes in Suessiales (Supplementary Table S1).

232

### 233 **Most tandemly duplicated genes undergo purifying selection**

234 To assess selection acting on TD genes, we focused on the two best-quality genome  
235 assemblies (based on number of scaffolds and N50 length) from each species (i.e., total of  
236 eight isolates), excluding the fragmented assemblies of *E. voratum* CCMP421 and *S.*  
237 *microadriaticum* CassKB8. We calculated the ratio  $\omega$  as the nonsynonymous substitution rate  
238 ( $K_a$ ) to synonymous substitution rate ( $K_s$ ) between all possible gene pairs within each TD  
239 block (Supplementary Table S6; see Methods); in general,  $\omega > 1.0$  indicates positive  
240 selection,  $\omega = 1.0$  indicates neutral selection, whereas  $\omega < 1.0$  indicates purifying selection  
241 (Yang and Bielawski 2000) among TD genes within a block. Based on this analysis,  
242 compared to genomes of symbiotic species, those of free-living species yielded larger  
243 proportions of TD blocks with mean  $\omega < 1.0$ , indicating purifying selection, i.e., 71.7% in *P.*  
244 *glacialis* and 67.7% in *E. voratum*, compared to 64.2% in *D. trenchii* and 49.1% in *S.*  
245 *microadriaticum* (Figure 4A; Supplementary Table S7). In all cases, the mean  $K_s$  value per  
246 TD block is less than 0.5 (Figure 4B). The observed mean  $\omega$  values are similar between two  
247 isolates of a species, e.g., mean variance of  $\omega = 0.26$  for both *P. glacialis* isolates  
248 (Supplementary Figure S2), suggesting a common pattern of selective pressures acting on TD  
249 genes for the species. An exception is the symbiotic *S. microadriaticum* (mean variance of  $\omega$   
250 = 0.16 for 04-503SCI.03 and 0.95 for CCMP2467; Supplementary Figure S2), but more  
251 genome data from other multi-isolate symbiotic species will enable the systematic  
252 investigation of the possible links between selection acting on TD genes and lifestyles.

253 To assess functions encoded by TD genes, we focused on TD gene blocks that were  
254 recovered in genomes of both isolates in one or more species. Functional annotation of these  
255 gene blocks is shown in Figure 4C, and the mean  $\omega$  value for the corresponding block is  
256 shown in Figure 4D. Genes encoding calmodulin, sulfotransfer domain-containing proteins,  
257 and disulfide-isomerase proteins were recovered in TD blocks in all eight isolates. Fructose-  
258 bisphosphate aldolase, dinoflagellate viral nucleoproteins, and caltractin were recovered in at



259 least 7 of the 8 isolates. Genes in TD blocks recovered only in free-living *P. glacialis* and *E.*  
260 *voratum* encode functions related to photosynthesis (i.e., photosystem I reaction centre  
261 subunit III, chloroplast TIC 20-II protein, PS II complex 12 kDa extrinsic protein, and  
262 peridinin-chlorophyll *a*-binding protein). In comparison, those in TD blocks found only in the  
263 two symbiotic species encode for Nek1 protein that is involved in maintaining centrosomes,  
264 and NaCP60E, a sodium channel protein. Most of these functions were encoded by no more  
265 than 50 TD genes per isolate (Figure 4C) in which the mean  $\omega$  per gene block was  $< 1$   
266 (Figure 4D). These results do not speak directly to the specificity of gene functions to tandem  
267 duplication in the genomes we analysed, given that some gene copies may also occur  
268 elsewhere in the genomes. However, our results suggest a tendency for TD genes within a  
269 block to undergo purifying selection, regardless of lifestyle.

270

## 271 **Concluding remarks**

272 Our results, based on multi-isolate whole-genome data from representative species,  
273 demonstrate how facultative lifestyle or the lack thereof has shaped the genome evolution of  
274 Symbiodiniaceae dinoflagellates. Generation of genetic and functional diversity at the  
275 intraspecies level implicates genetic duplication, including tandem duplication of genes. All  
276 these evolutionary regimes are under the constraint of genome reduction that is hypothesised  
277 to pre-date the diversification of Order Suessiales (Shah et al. 2023). Although our results  
278 hint at the potential linkages of facultative lifestyles to some of the varying features observed  
279 between free-living versus symbiotic species, whole-genome data from a broader taxonomic  
280 representation (and from multiple isolates) will enable a more-systematic investigation to  
281 establish these linkages.

282

## 283 **Methods**

### 284 **Data**

285 For this study, we used publicly available genome assemblies and gene models of *D. trenchii*  
286 CCMP2556 and SCF082 (Dougan et al. 2022a), *E. voratum* isolates RCC1521, rt-383, and  
287 CCMP421 (Shah et al. 2023), *S. microadriaticum* CCMP2467 (Nand et al. 2021), 04-  
288 503SCI.03 and CassKB8 (González-Pech et al. 2021), and *P. glacialis* CCMP1383 and  
289 CCMP2088 (Stephens et al. 2020) (Supplementary Table S1). To contrast the contiguity of

290 these genome assemblies, we obtained chromosome numbers from cytological observations  
291 (Blank and Trench 1985; Jeong et al. 2014; Wham et al. 2017). For tandem gene duplication  
292 analysis, we used genomic datasets from 9 more Symbiodiniaceae isolates (Supplementary  
293 Table S1) generated in Chen et al. (2020; 2022), González-Pech et al. (2021), and Shoguchi  
294 et al. (2013; 2018). To determine the intraspecific identity of the three *E. voratum* genome  
295 datasets, we mapped the short-read gDNA of each isolate obtained from (Shah et al. 2023) to  
296 each other using Bowtie2 v2.4.4 (Langmead and Salzberg 2012) with the *--very-fast*  
297 algorithm.

### 298 **Assessment of genome-sequence similarity based on alignment**

299 To assess genome-sequence similarity of the four target species based on sequence  
300 alignment, we used nucmer (*--mum*) implemented in MUMmer 4.0.0beta2 (Marçais et al.  
301 2018) at minimum alignment lengths of 100 bp, 1 Kb, and 10 Kb to align assembled genome  
302 sequences for every possible pair of isolates in each species. For each pairwise comparison,  
303 we calculated the percentage of aligned bases,  $Q$ , and overall sequence identity of aligned  
304 regions,  $ID$ . Maximum values of for both  $Q$  and  $ID$  at 100% indicate that two genome  
305 sequences are identical. We then used mummerplot (*-f--layout*) and dnadiff to generate  
306 figures and reports for these alignments.

### 307 **Assessment of genome-sequence similarity using an alignment-free approach**

308 Adopting the same approach described in Lo et al. (2022), we calculated  $D_2^S$  statistic based on  
309 shared  $k$ -mers for each pair of genomes, from which a distance ( $d$ ) was derived. Briefly,  
310 Jellyfish v2.3.0 (Marçais and Kingsford 2011) was used to derive  $k$ -mers (at  $k = 23$ ) from  
311 each genome assembly, from which distances were calculated using *d2ssect*  
312 (<https://github.com/bakeronit/d2ssect>) from all possible pairs of genomes. Following the  
313 earlier studies (Lo et al. 2022; Shah et al. 2023), core 23-mers among isolates of each species  
314 were identified from the extracted 23-mers, using the bash command *comm* (-12). BEDtools  
315 (Quinlan and Hall 2010) *intersect* was used to find regions of overlap between the core  $k$ -  
316 mers and different genomic features.

### 317 **Gene family evolution and introner element search**

318 To infer homologous protein sets among isolates for a species, all protein sequences predicted  
319 from all isolates were used as input for OrthoFinder v2.5.4 (Emms and Kelly 2019). The  
320 analysis was conducted at different inflation parameters ( $I = 1.5, 2.0, 4.0, 6.0, 8.0, \text{ or } 10.0$ ).

321 From the generated homologous protein sets, the proportion of isolate-specific sets was  
322 identified. To identify introner elements, we used the introner element sequences identified in  
323 Shah et al. (2023) from eight Suessiales isolates as a reference for Pattern Locator (Mrázek  
324 and Xie 2006) to search for inverted and direct repeat motifs within introns.

### 325 **Identification of collinear gene blocks and types of gene duplication**

326 To identify collinear gene blocks shared by isolates of a species, we first identified  
327 homologous protein sequences using BLASTp (e-value  $< 10^{-5}$ , query or subject cover  $> 50\%$ ,  
328 filtered for top five hits for each query). This output was used as input for MCSanX (Wang  
329 et al. 2012) (-b 2) to search for collinear gene blocks between all possible pairs of isolates.  
330 For *D. trenchii*, we filtered out duplicated genes (Dougan et al. 2022a) from the MCSanX  
331 output by selecting gene pairs that were more similar to each other (i.e., low nonsynonymous  
332 ( $K_a$ ) + synonymous ( $K_s$ ) substitution score), then chose gene blocks that still contained  $\geq 5$   
333 genes. Gene Ontology (GO) terms were assigned to all gene sets via UniProt (version  
334 2022\_01) to GO (version December 2022) ID mapping on the UniProt website  
335 (uniprot.org/id-mapping). The *duplicate\_gene\_classifier* implemented in MCSanX was used  
336 to assess five distinct type of gene duplications: 1) singleton = not duplicated, 2) dispersed =  
337 duplicated with  $> 10$  genes in between, 3) proximal = duplicated with  $< 10$  genes in between,  
338 4) WGD = whole or segmental genome duplication inferred by anchor genes in collinear gene  
339 blocks comprising at least 5 genes, 5) tandem = duplicated one after the other, i.e., two or  
340 more consecutive genes on the same scaffold.

### 341 **Analysis of tandemly duplicated genes**

342 Tandemly duplicated (TD) genes were identified based on the results of MCSanX above.  
343 For this analysis, we focused on two best-quality genome assemblies from each species, i.e.,  
344 for a total of eight genomes. For each TD block, we calculated the nonsynonymous  
345 substitution rate ( $K_a$ ) and synonymous rate ( $K_s$ ) between all possible pairs of genes within the  
346 block, using the *add\_ka\_and\_ks\_to\_collinearity.pl* script implemented in MCSanX (Wang  
347 et al. 2012). The ratio  $\omega$  was defined as  $K_a/K_s$ . When assessing mean  $\omega$  for each TD block,  
348 instances of infinity values, e.g., due to  $K_s = 0$ , were ignored.

## 349 **Competing interests**

350 Authors declare that they have no competing interests.

## 351 **Author contributions**

352 Conceptualization, SS, KED, DB and CXC; methodology, SS, KED, YC, and CXC; formal  
353 analysis, SS, KED, and YC; investigation, SS, KED; writing—original draft preparation, SS;  
354 writing—review and editing, SS, KED, DB, and CXC; visualisation, SS; supervision, KED,  
355 DB, CXC; funding acquisition, DB and CXC. All authors have read and agreed to the  
356 published version of the manuscript.

## 357 **Funding**

358 This research was supported by the University of Queensland Research Training Program  
359 scholarship (SS and YC), and the Australian Research Council grant DP19012474 awarded to  
360 CXC and DB. DB was also supported by NSF grant NSF-OCE 1756616 and a NIFA-USDA  
361 Hatch grant (NJ01180).

## 362 **Acknowledgements**

363 This project is supported by high-performance computing facilities at the National  
364 Computational Infrastructure (NCI) National Facility systems through the NCI Merit  
365 Allocation Scheme (Project d85) awarded to CXC, the University of Queensland Research  
366 Computing Centre, and computing facility at the Australian Centre for Ecogenomics, School  
367 of Chemistry and Molecular Biosciences at the University of Queensland.

368  
369

## 370 **References**

371

372 Allen Coral Atlas. 2022. Imagery, maps and monitoring of the world's tropical coral reefs.  
373 Available from: <https://doi.org/10.5281/zenodo.3833242>

374 Blank RJ, Trench RK. 1985. Speciation and symbiotic dinoflagellates. *Science*. 229:656-658.

375 Carretero-Paulet L, Van de Peer Y. 2020. The evolutionary conundrum of whole-genome  
376 duplication. *American Journal of Botany*. 107:1101-1105.

377 Chen Y, González-Pech RA, Stephens TG, Bhattacharya D, Chan CX. 2020. Evidence that  
378 inconsistent gene prediction can mislead analysis of dinoflagellate genomes. *Journal of*  
379 *Phycology*. 56:6-10.

380 Chen Y, Shah S, Dougan KE, van Oppen MJH, Bhattacharya D, Chan CX. 2022. Improved  
381 *Cladocopium goreau* genome assembly reveals features of a facultative coral symbiont and  
382 the complex evolutionary history of dinoflagellate genes. *Microorganisms*. 10:1662.

383 Dougan KE, Bellantuono AJ, Kahlke T, Abbriano RM, Chen Y, Shah S, Granados-Cifuentes  
384 C, van Oppen MJH, Bhattacharya D, Suggett DJ, et al. 2022a. Whole-genome duplication in  
385 an algal symbiont serendipitously confers thermal tolerance to corals. *bioRxiv*.  
386 2022.04.10.487810.

387 Dougan KE, Deng Z-L, Wöhlbrand L, Reuse C, Bunk B, Chen Y, Hartlich J, Hiller K, John  
388 U, Kalvelage J, et al. 2022b. Multi-omics analysis reveals the molecular response to heat  
389 stress in a “red tide” dinoflagellate. *bioRxiv*. 2022.07.25.501386.

390 Dougan KE, González-Pech RA, Stephens TG, Shah S, Chen Y, Ragan MA, Bhattacharya D,  
391 Chan CX. 2022c. Genome-powered classification: insights gained from coral algal  
392 symbionts. *Trends in Microbiology*. 30:831-840.

393 Emms DM, Kelly S. 2019. OrthoFinder: phylogenetic orthology inference for comparative  
394 genomics. *Genome Biology*. 20:238.

395 Farhat S, Le P, Kayal E, Noel B, Bigeard E, Corre E, Maumus F, Florent I, Alberti A, Aury J-  
396 M, et al. 2021. Rapid protein evolution, organellar reductions, and invasive intronic elements  
397 in the marine aerobic parasite dinoflagellate *Amoebophrya* spp. *BMC Biology*. 19:1.

398 González-Pech RA, Bhattacharya D, Ragan MA, Chan CX. 2019. Genome evolution of coral  
399 reef symbionts as intracellular residents. *Trends in Ecology & Evolution*. 34:799-806.

400 González-Pech RA, Stephens TG, Chen Y, Mohamed AR, Cheng Y, Shah S, Dougan KE,  
401 Fortuin MDA, Lagorce R, Burt DW, et al. 2021. Comparison of 15 dinoflagellate genomes

- 402 reveals extensive sequence and structural divergence in family Symbiodiniaceae and genus  
403 *Symbiodinium*. BMC Biology. 19:73.
- 404 Huff JT, Zilberman D, Roy SW. 2016. Mechanism for DNA transposons to generate introns  
405 on genomic scales. Nature. 538:533-536.
- 406 Hume BCC, Smith EG, Ziegler M, Warrington HJM, Burt JA, LaJeunesse TC, Wiedenmann  
407 J, Voolstra CR. 2019. SymPortal: A novel analytical framework and platform for coral algal  
408 symbiont next-generation sequencing ITS2 profiling. Molecular Ecology Resources.  
409 19:1063-1080.
- 410 Jeong HJ, Lee SY, Kang N, Yoo Y, Lim AS, Lee MJ, Yih W, Yamashita H, LaJeunesse T.  
411 2014. Genetics and morphology characterize the dinoflagellate *Symbiodinium voratum*, n. sp.,  
412 (Dinophyceae) as the sole representative of *Symbiodinium* Clade E. The Journal of  
413 Eukaryotic Microbiology. 61:75-94.
- 414 LaJeunesse TC, Parkinson JE, Gabrielson PW, Jeong HJ, Reimer JD, Voolstra CR, Santos  
415 SR. 2018. Systematic revision of Symbiodiniaceae highlights the antiquity and diversity of  
416 coral endosymbionts. Current Biology. 28:2570-2580.
- 417 Langmead B, Salzberg SL. 2012. Fast gapped-read alignment with Bowtie 2. Nature  
418 Methods. 9:357-359.
- 419 Lo R, Dougan KE, Chen Y, Shah S, Bhattacharya D, Chan CX. 2022. Alignment-free  
420 analysis of whole-genome sequences from Symbiodiniaceae reveals different phylogenetic  
421 signals in distinct regions. Frontiers in Plant Science. 13:815714.
- 422 Marçais G, Delcher AL, Phillippy AM, Coston R, Salzberg SL, Zimin A. 2018. MUMmer4:  
423 A fast and versatile genome alignment system. PLOS Computational Biology. 14:e1005944.
- 424 Marçais G, Kingsford C. 2011. A fast, lock-free approach for efficient parallel counting of  
425 occurrences of *k*-mers. Bioinformatics. 27:764-770.
- 426 Mrázek J, Xie S. 2006. Pattern locator: a new tool for finding local sequence patterns in  
427 genomic DNA sequences. Bioinformatics. 22:3099-3100.
- 428 Nand A, Zhan Y, Salazar OR, Aranda M, Voolstra CR, Dekker J. 2021. Genetic and spatial  
429 organization of the unusual chromosomes of the dinoflagellate *Symbiodinium*  
430 *microadriaticum*. Nature Genetics. 53:618-629.
- 431 Quinlan AR, Hall IM. 2010. BEDTools: a flexible suite of utilities for comparing genomic  
432 features. Bioinformatics. 26:841-842.
- 433 Reich HG, Kitchen SA, Stankiewicz KH, Devlin-Durante M, Fogarty ND, Baums IB. 2021.  
434 Genomic variation of an endosymbiotic dinoflagellate (*Symbiodinium 'fitti'*) among closely  
435 related coral hosts. Molecular Ecology. 30:3500-3514.

- 436 Shah S, Dougan KE, Chen Y, Lo R, Laird G, Fortuin MDA, Rai SK, Murigneux V,  
437 Bellantuono AJ, Rodriguez-Lanetty M, et al. 2023. Massive genome reduction occurred prior  
438 to the origin of coral algal symbionts. *bioRxiv*. 2023.03.24.534093.
- 439 Shoguchi E, Beedessee G, Tada I, Hisata K, Kawashima T, Takeuchi T, Arakaki N, Fujie M,  
440 Koyanagi R, Roy MC, et al. 2018. Two divergent *Symbiodinium* genomes reveal conservation  
441 of a gene cluster for sunscreen biosynthesis and recently lost genes. *BMC Genomics*. 19:458.
- 442 Shoguchi E, Shinzato C, Kawashima T, Gyoja F, Mungpakdee S, Koyanagi R, Takeuchi T,  
443 Hisata K, Tanaka M, Fujiwara M, et al. 2013. Draft assembly of the *Symbiodinium minutum*  
444 nuclear genome reveals dinoflagellate gene structure. *Current Biology*. 23:1399-1408.
- 445 Stephens TG, González-Pech RA, Cheng Y, Mohamed AR, Burt DW, Bhattacharya D,  
446 Ragan MA, Chan CX. 2020. Genomes of the dinoflagellate *Polarella glacialis* encode  
447 tandemly repeated single-exon genes with adaptive functions. *BMC Biology*. 18:56.
- 448 Thornhill DJ, Lewis AM, Wham DC, LaJeunesse TC. 2014. Host-specialist lineages  
449 dominate the adaptive radiation of reef coral endosymbionts. *Evolution*. 68:352-367.
- 450 van der Burgt A, Severing E, de Wit PJ, Collemare J. 2012. Birth of new spliceosomal  
451 introns in fungi by multiplication of introner-like elements. *Current Biology*. 22:1260-1265.
- 452 Wang Y, Tang H, Debarry JD, Tan X, Li J, Wang X, Lee T-h, Jin H, Marler B, Guo H, et al.  
453 2012. MScanX: a toolkit for detection and evolutionary analysis of gene synteny and  
454 collinearity. *Nucleic Acids Research*. 40:e49.
- 455 Wham DC, Ning G, LaJeunesse TC. 2017. *Symbiodinium glynnii* sp. nov., a species of stress-  
456 tolerant symbiotic dinoflagellates from pocilloporid and montiporid corals in the Pacific  
457 Ocean. *Phycologia*. 56:396-409.
- 458 Wilkinson SP, Fisher PL, van Oppen MJH, Davy SK. 2015. Intra-genomic variation in  
459 symbiotic dinoflagellates: recent divergence or recombination between lineages? *BMC*  
460 *Evolutionary Biology*. 15:46.
- 461 Worden AZ, Lee J-H, Mock T, Rouzé P, Simmons MP, Aerts AL, Allen AE, Cuvelier ML,  
462 Derelle E, Everett MV, et al. 2009. Green evolution and dynamic adaptations revealed by  
463 genomes of the marine picoeukaryotes *Micromonas*. *Science*. 324:268-272.
- 464 Yang Z, Bielawski JP. 2000. Statistical methods for detecting molecular adaptation. *Trends in*  
465 *Ecology & Evolution*. 15:496-503.
- 466
- 467

468 **Table**

469 **Table 1. Tandemly duplicated (TD) genes within 19 Suessiales isolates.**

470 TD genes were defined as  $\geq 2$  consecutive genes on the same scaffold making up a “block”,  
 471 with its size represented by the total number of consecutive TD genes.

| Species and isolate                    | Number of TD genes | Number of TD blocks | Median of TD block size | Maximum TD block size | Number of single-exon genes in the genome | % of single-exon genes among TD genes |
|----------------------------------------|--------------------|---------------------|-------------------------|-----------------------|-------------------------------------------|---------------------------------------|
| <i>B. minutum</i> Mf1.05b.01           | 1,225 (3.7%)       | 569                 | 2                       | 7                     | 2,054 (6.3%)                              | 9.9                                   |
| <i>Cladocopium</i> sp. C92             | 1,148 (2.5%)       | 536                 | 2                       | 8                     | 789 (1.7%)                                | 2.2                                   |
| <i>C. goreauii</i> SCF055              | 2,017 (6.0%)       | 937                 | 2                       | 7                     | 1,870 (5.6%)                              | 9.6                                   |
| <i>D. trenchii</i> CCMP2556            | 1,031 (1.8%)       | 745                 | 2                       | 6                     | 3,828 (6.9%)                              | 9.2                                   |
| <i>D. trenchii</i> SCF082              | 1,045 (2.0%)       | 645                 | 2                       | 6                     | 5,677 (10.6%)                             | 7.5                                   |
| <i>E. voratum</i> CCMP421              | 495 (1.5%)         | 233                 | 2                       | 4                     | 1,420 (4.4%)                              | 5.1                                   |
| <i>E. voratum</i> RCC1521              | 1,405 (4.4%)       | 559                 | 3                       | 9                     | 3,983 (12.0%)                             | 23.1                                  |
| <i>E. voratum</i> rt-383               | 1,567 (3.9%)       | 635                 | 3                       | 7                     | 3,574 (9.0%)                              | 22.5                                  |
| <i>S. linucheae</i> CCMP2456           | 737 (2.3%)         | 348                 | 2                       | 6                     | 255 (0.8%)                                | 8.4                                   |
| <i>S. microadriaticum</i> 04-503SCI.03 | 437 (1.1%)         | 206                 | 2                       | 4                     | 2,734 (7.1%)                              | 5.9                                   |
| <i>S. microadriaticum</i> CassKB8      | 418 (1.0%)         | 200                 | 2                       | 4                     | 3,074 (7.2%)                              | 5.7                                   |
| <i>S. microadriaticum</i> CCMP2467     | 1,060 (2.2%)       | 475                 | 2                       | 7                     | 2,770 (5.7%)                              | 4.2                                   |
| <i>S. natans</i> CCMP2548              | 2,499 (7.1%)       | 1,021               | 2                       | 13                    | 5,099 (14.5%)                             | 21.8                                  |
| <i>S. necroappetens</i> CCMP2469       | 577 (1.6%)         | 274                 | 2                       | 6                     | 3,187 (8.9%)                              | 14.9                                  |
| <i>S. pilosum</i> CCMP2461             | 496 (2.1%)         | 236                 | 2                       | 4                     | 1,431 (6.1%)                              | 8.3                                   |
| <i>S. tridacnidorum</i> CCMP2592       | 2,491 (6.5%)       | 1,254               | 2                       | 10                    | 5,192 (11.4%)                             | 19.2                                  |
| <i>S. tridacnidorum</i> Sh18           | 581 (2.3%)         | 272                 | 2                       | 5                     | 3,033 (11.8%)                             | 9                                     |
| <i>P. glacialis</i> CCMP1383           | 5,376 (9.2%)       | 2,095               | 2                       | 16                    | 15,263 (26.2%)                            | 59.4                                  |
| <i>P. glacialis</i> CCMP2088           | 4,028 (7.8%)       | 1,634               | 2                       | 14                    | 12,619 (24.4%)                            | 55.2                                  |

472



## 473 Figures

474

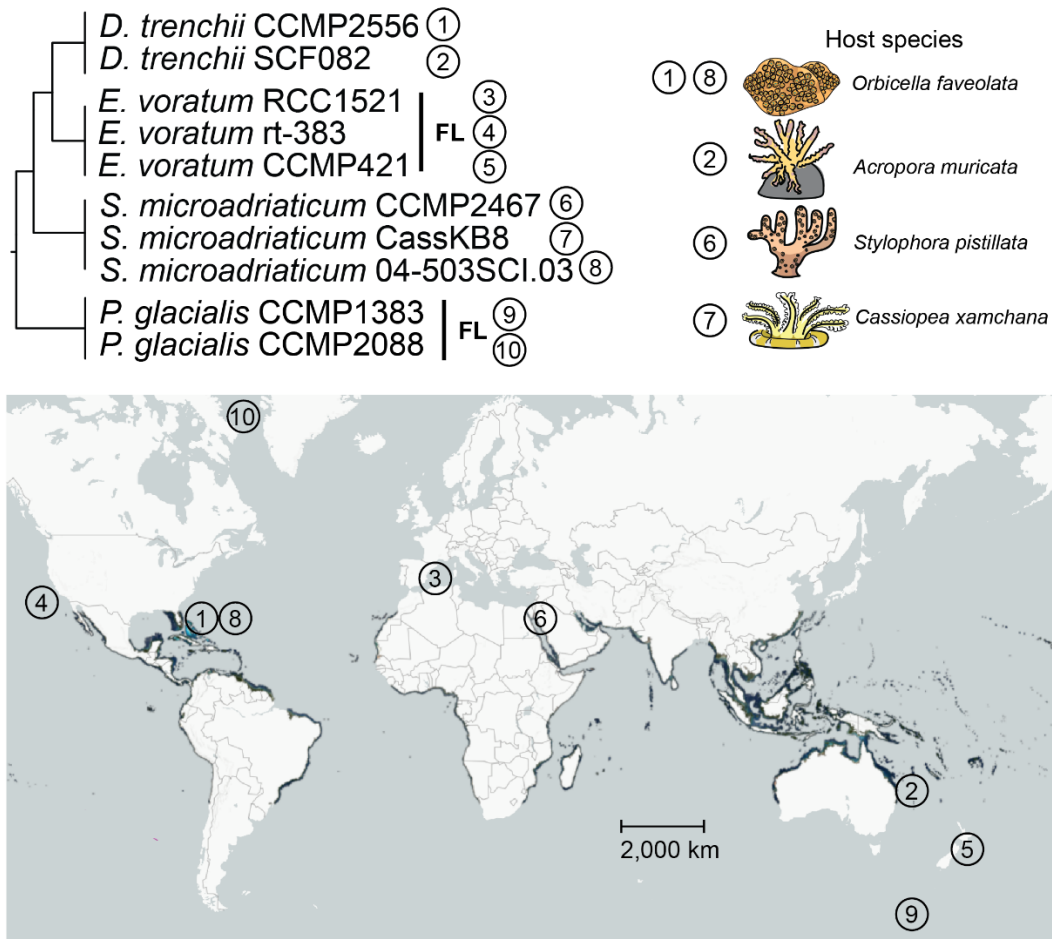

475  
476 **Figure 1. Suessiales species, following LSU rDNA phylogeny (LaJeunesse et al. 2018),**  
477 **for which genome data of multiple isolates are available.**

478 Coral reef (in dark blue and cyan) world map by Allen Coral Atlas (2022). Those not marked  
479 FL (free-living) are symbiotic and their host species are represented on the top right.

480

481

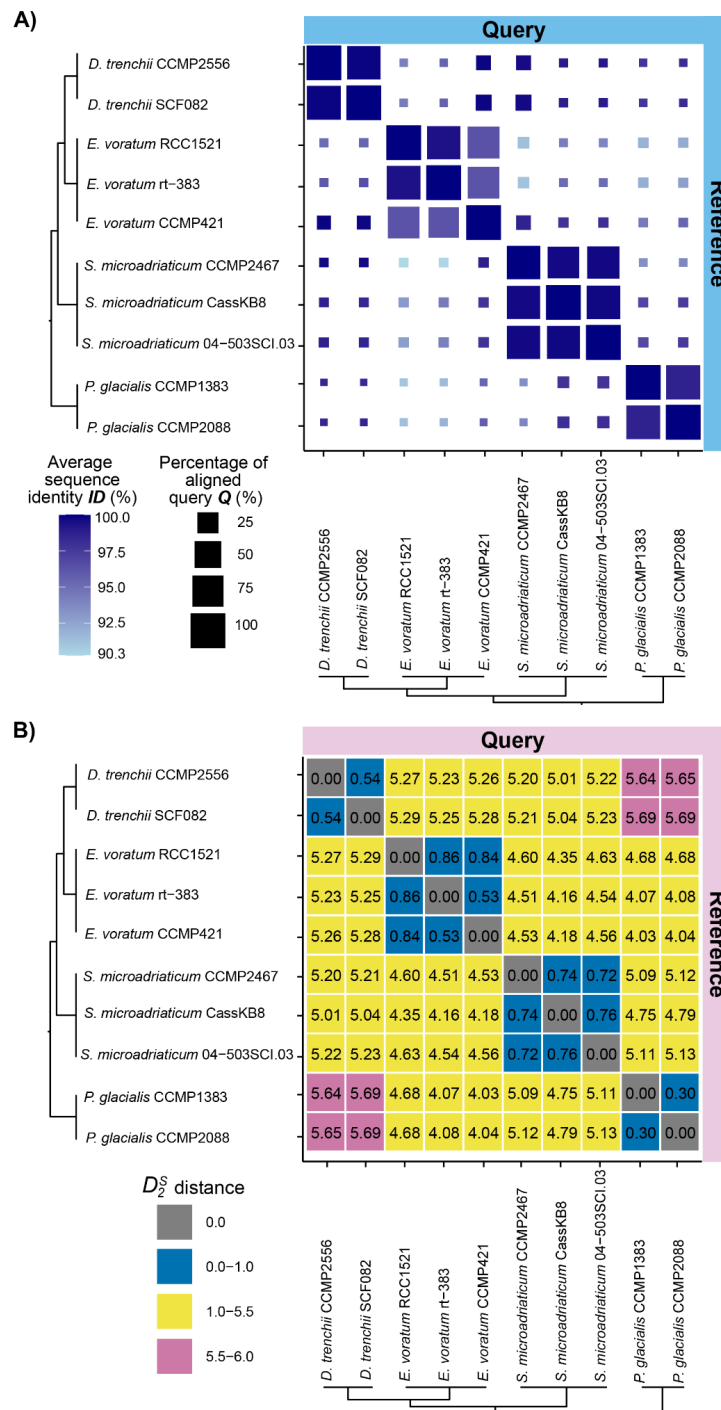

482

483 **Figure 2. Intra/interspecies genome sequence identity among the four Suessiales species.**

484 (A) Alignment-based identity (minimum alignment length = 100 bp) with query genome  
 485 sequences (y-axis) aligned to the references (x-axis). The colour of the squares corresponds to  
 486 percent sequence identity  $ID$  (darker blue = higher identity) and the sizes represent the  
 487 percentage of the query genome sequence  $Q$  aligned to the reference. (B) Alignment-free  $D_2^S$   
 488 distances ( $d$ ) showing delineation between species ( $d < 1$  in blue), Family ( $d$  between 1.0 and  
 489 5.5 in yellow), and the longest evolutionary distance across the Order ( $d > 5.5$  in pink).

490

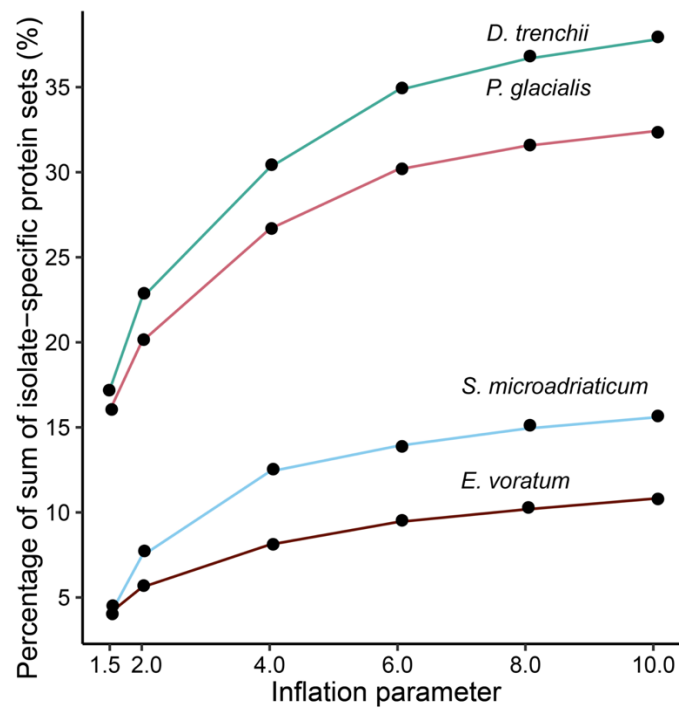

491

492 **Figure 3. The percentage of isolate-specific protein sets in each Suessiales species.**

493 Protein sequences were clustered at inflation parameter  $I$  between 1.5 and 10 using

494 OrthoFinder.

495

496

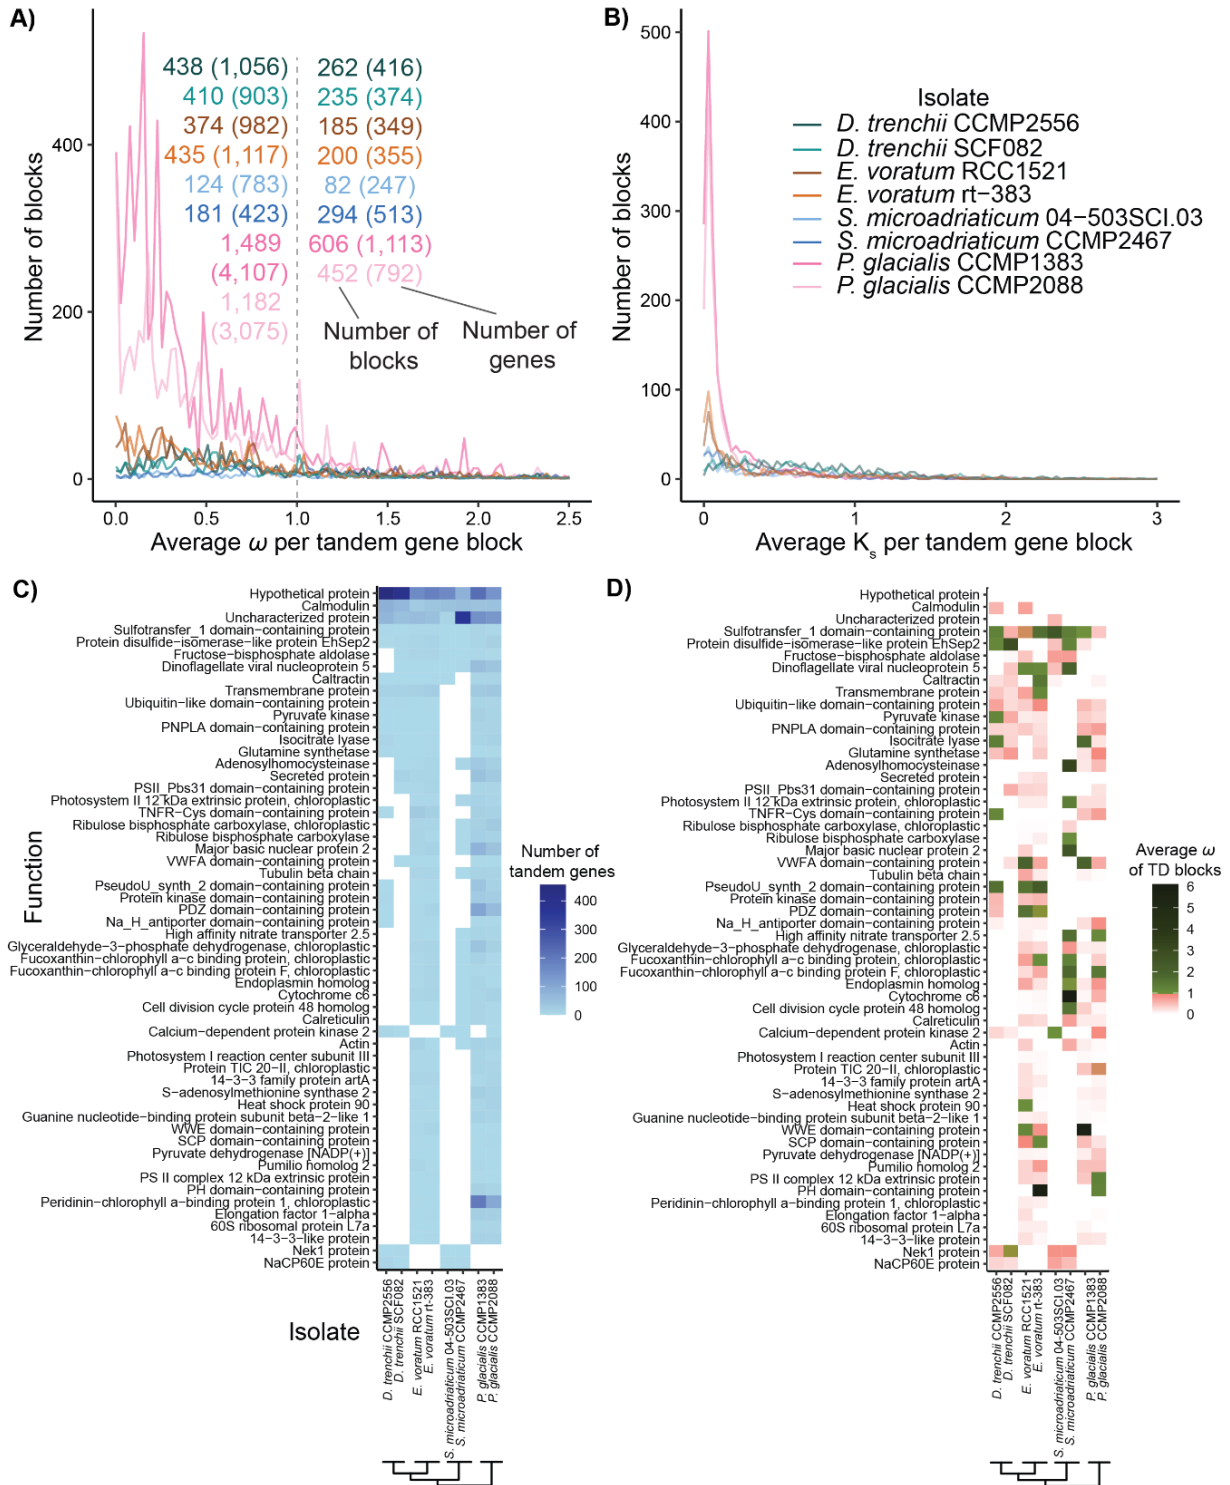

497

498 **Figure 4. TD genes and their functions in eight Suessiales isolates.**

499 The number of TD blocks showing distribution respectively for (A) mean  $\omega$  and (B) mean  $K_s$

500 of each TD block and its associated TD genes with  $\omega < 1$  or  $> 1$ . Functions encoded by TD

501 blocks that were recovered in genomes of both isolates in one or more species, showing the

502 (C) sum of TD genes, (D) mean  $\omega$ .
